# Supplementary material
Source: HighWire-hosted journal article supplement (http://qualitysafety.bmj.com/highwire/filestream/147343/field_highwire_adjunct_files/0/Appendix_Table_1.pdf)
Supplement: Appendix_Table_1.pdf [file Appendix_Table_1.pdf]

Appendix Table: Comparative patient safety data for organisations

| Site | PEAT<br>Environ-<br>ment<br>score<br>(1)             | HSMR<br>All*<br>(2) | HSMR<br>non-<br>elective<br>* | HSM<br>R<br>stroke<br>* | Low<br>mortali-<br>ty CCS<br>groups<br>(3) | NRLS<br>report<br>(4) | Dr<br>Foster<br>Commit-<br>ment<br>to<br>safety * | MRSA<br>rates<br>per<br>1,000<br>bed<br>days (5) |
|------|------------------------------------------------------|---------------------|-------------------------------|-------------------------|--------------------------------------------|-----------------------|---------------------------------------------------|--------------------------------------------------|
| A    | Good                                                 | 80                  | 80                            | 80                      | 0.0009                                     | 2.81                  | 70                                                | 8                                                |
| B    | Good                                                 | 90                  | 90                            | 130                     | 0.0024                                     | 0.38                  | 80                                                | 0                                                |
| C    | Good                                                 | 90                  | 90                            | 120                     | 0.0019                                     | 1.76                  | 90                                                | 4                                                |
| D    | Good                                                 | 100                 | 100                           | 100                     | 0.0019                                     | 7.53                  | 80                                                | 6                                                |
| E    | Data not available (UK but non-English organisation) |                     |                               |                         |                                            |                       |                                                   |                                                  |
| F    | Excellen-<br>t                                       | 90                  | 90                            | 110                     | 0.0013                                     | 1.39                  | 90                                                | 3                                                |
| G    | Data not available (UK but non-English organisation) |                     |                               |                         |                                            |                       |                                                   |                                                  |

Notes to table:

\* Scores have been rounded to nearest 10 to maintain anonymity. Scores range from 0 (poor) to 100 (excellent) and represent an overall score based on a number of safety indicators.

1. PEAT: Patient Environment Action Team

2. HSMR: hospital standardised mortality ratio

3. CCS: clinical classification system

4. NRLS: National Patient Safety Agency's national reporting and learning system. Incidents reported per 100 admissions.

5. MRSA: multi-resistant Staphylococcus aureus infection
